# Supplementary material
Source: PubMed Central journal article supplement (PMC7726946)
Supplement: ao0c04605_si_001.pdf [file ao0c04605_si_001.pdf]

# Supporting information

## Synthesis and application of AS1411 functionalized gold nanoparticles for targeted therapy of gastric cancer

Yajie Zhang<sup>1,2</sup>, Jingwei Tan<sup>1</sup>, Lu Zhou<sup>1</sup>, Xiaoqing Shan<sup>1</sup>, Jianling Liu<sup>1</sup>, Yong Ma<sup>1\*</sup>

<sup>1</sup> Department of Chemistry, School of Fundamental Sciences, China Medical University, Shenyang 110122, China

<sup>2</sup> Department of gastroenterology, Shengjing Hospital of China Medical University, Shenyang 110004, China

\* Corresponding author

E-mail address: yma10@cmu.edu.cn.

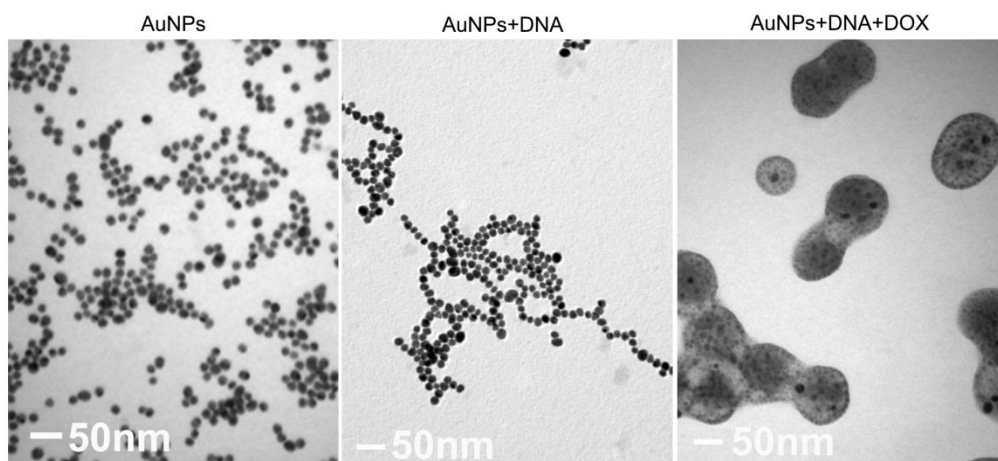

Figure S1. TEM: ( The image on the left ) AuNPs; (The middle image) AuNPs+DNA ( AS1411+Hairpin DNA ); ( The image on the right ) AuNPs+DNA( AS1411+Hairpin DNA )+DOX.

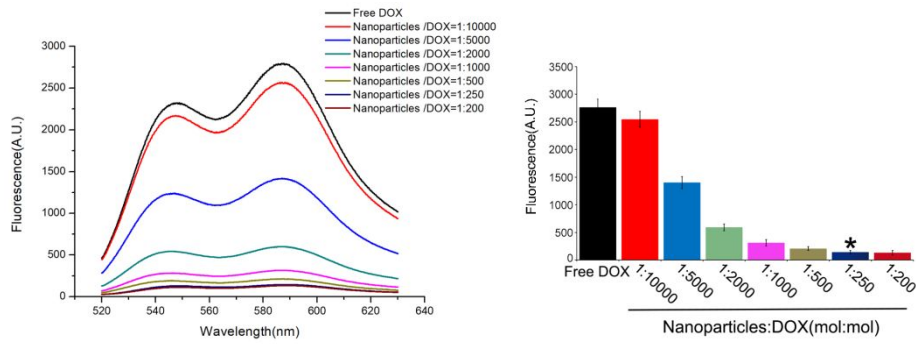

Figure S2. AS1411-based nanoparticles quenching DOX fluorescence. (The image on the left) The curves of DOX fluorescence. (The image on the right) The free DOX fluorescence intensity at  $\lambda=590$  nm after being quenched. \* $P < 0.05$  compared with other groups except for the group (1:200).

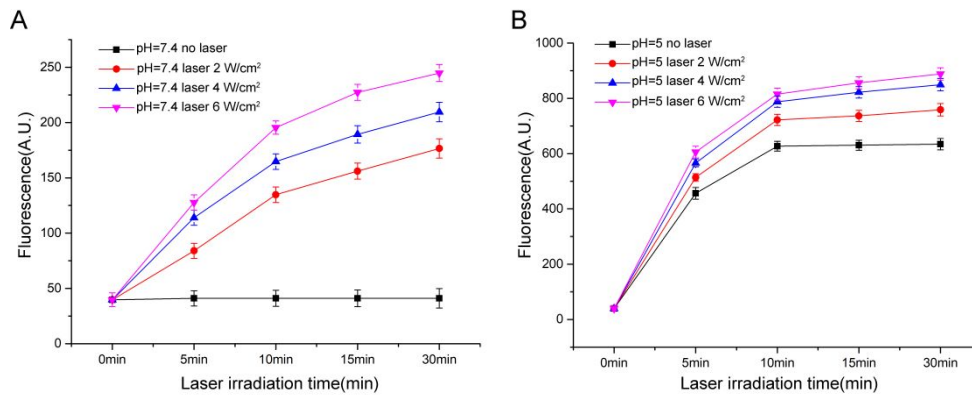

Figure S3. Drug release test. The fluorescence intensity ( $\lambda=590$  nm) of DOX under the 808 nm laser irradiation (2, 4, 6 W/cm<sup>2</sup>) or no laser (dark) for different time periods at pH 7.4 (A) or pH 5.0 (B).
